# Supplementary material for: Irisin Ameliorates Neuroinflammation and Neuronal Apoptosis Through Integrin αVβ5/AMPK Signaling Pathway After Intracerebral Hemorrhage in Mice
Source: Research Square preprint supplement (doi:10.21203/rs.3.rs-1345807/v1), 2022-02-15
Supplement: Supplementary file 2 [file fc1c722697213180afec3e91.docx]

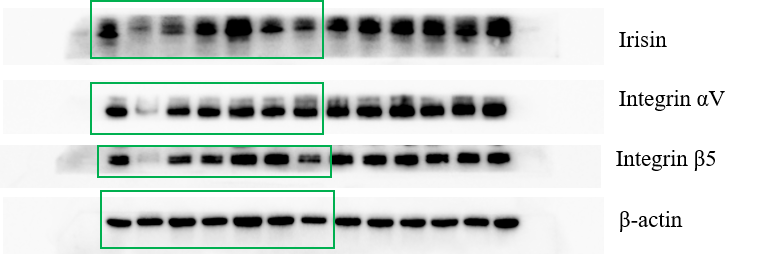


Figure S2. Uncropped images of blots presented in Figures 1A.


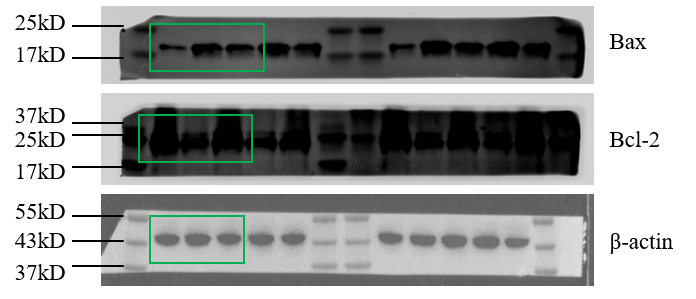


Figure S3. Uncropped images of blots presented in Figure 4E.


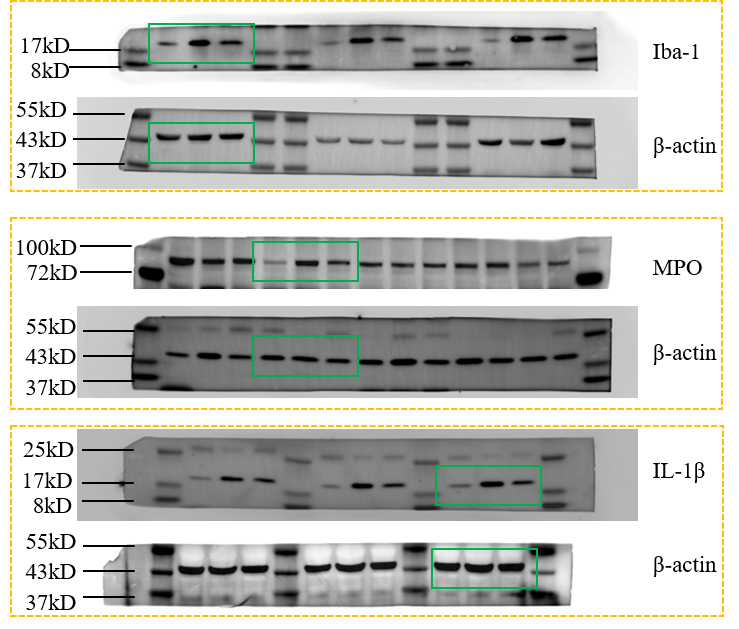


Figure S4. Uncropped images of blots presented in Figure 5E, 5F, and 5G.


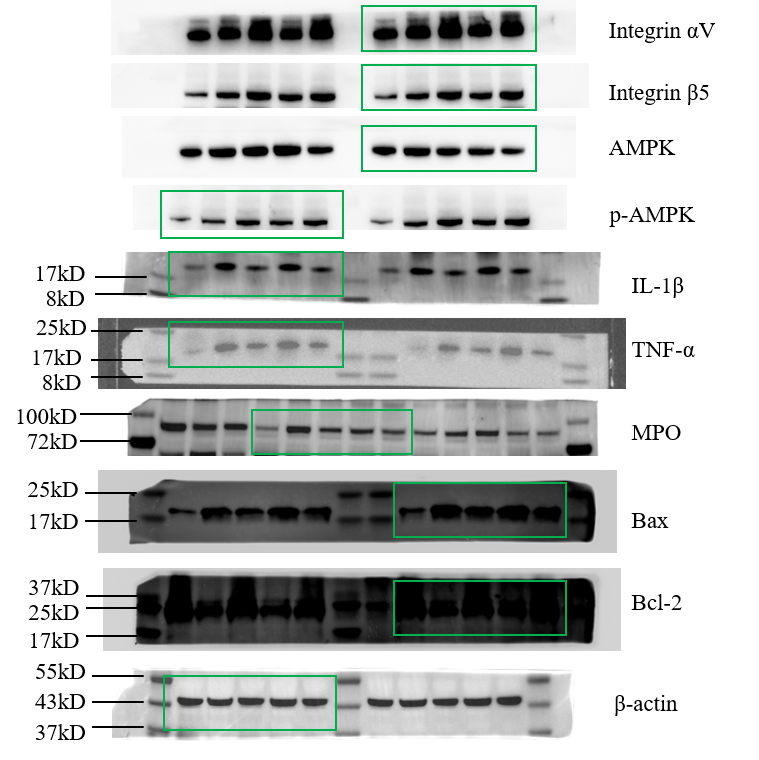


Figure S5. Uncropped images of blots presented in Figure 7D.


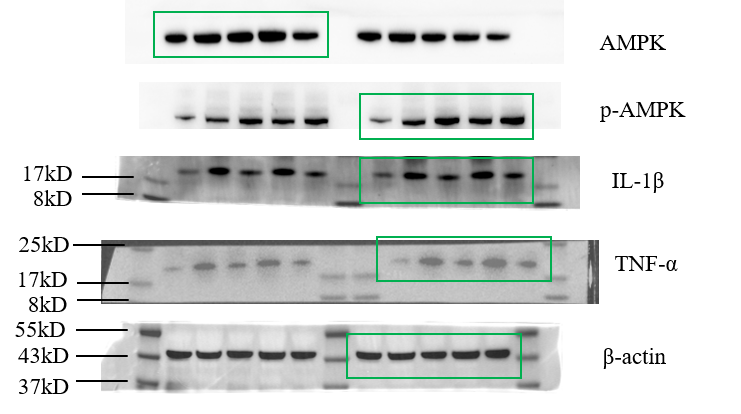


Figure S6. Uncropped images of blots presented in Figure 8D.
